# Supplementary material for: Facile, one-pot solvothermal method to synthesize ultrathin Sb2S3nanosheets anchored on graphene
Source: Royal Society of Chemistry journal article supplement (doi:10.1039/c4dt01609b), 2014-07-22
Supplement: c4dt01609b1.pdf [file c4dt01609b1.pdf]

## **Supporting information**

### **Facile one-pot solvothermal method to synthesize ultrathin Sb<sub>2</sub>S<sub>3</sub> nanosheets anchored on graphene**

Baoping Lu <sup>a, b</sup>, Jilin Tang <sup>a, \*</sup>

<sup>a</sup> State Key Laboratory of Electroanalytical Chemistry, Changchun  
Institute of Applied Chemistry, Chinese Academy of Sciences,  
Changchun, Jilin 130022, People's Republic of China

<sup>b</sup> University of Chinese Academy of Sciences, Beijing, 100049,  
People's Republic of China

\*E-mail: jltang@ciac.ac.cn

Fax: +86-431-85262734; Tel: +86-431-85262734

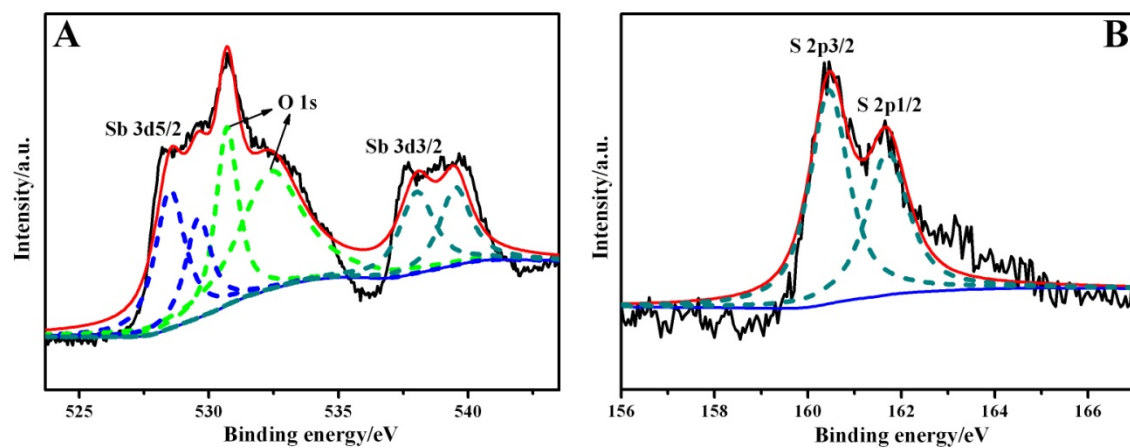

**Fig. S1** High-resolution XPS spectra of Sb 3d (A) and S 2p (B).

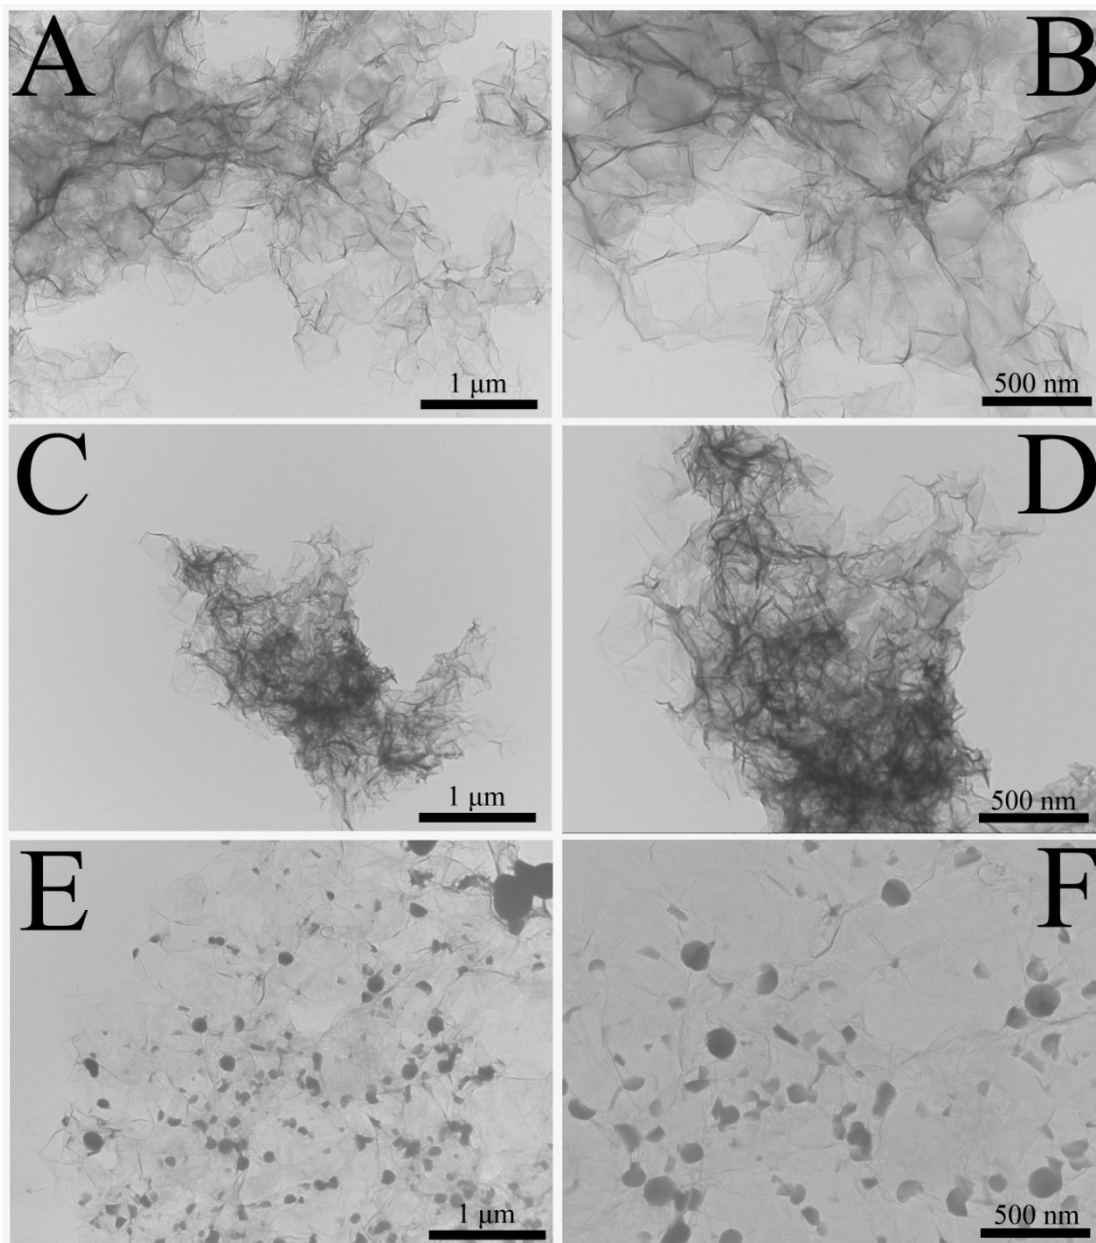

**Fig. S2** TEM images of  $\text{Sb}_2\text{S}_3$ -G prepared in water (A, B), water/EG (C, D) and EG (E, F).

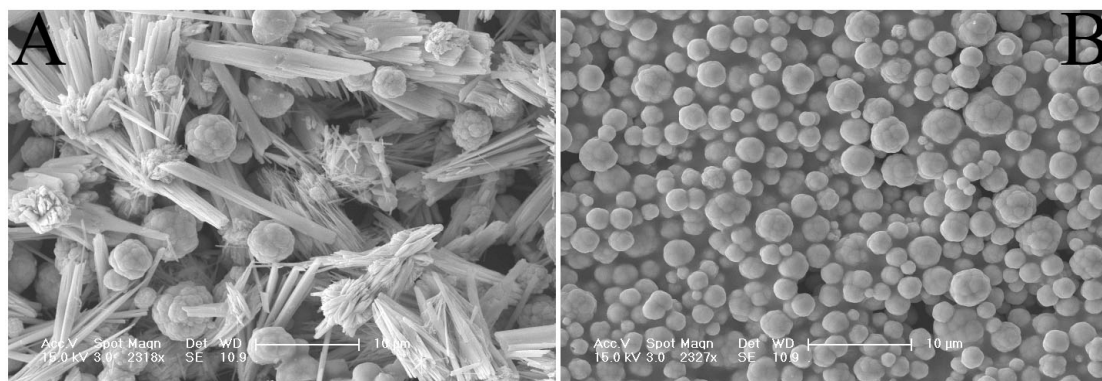

**Fig. S3** SEM images of Sb<sub>2</sub>S<sub>3</sub> prepared in water (A) and water/EG (B) solvent.

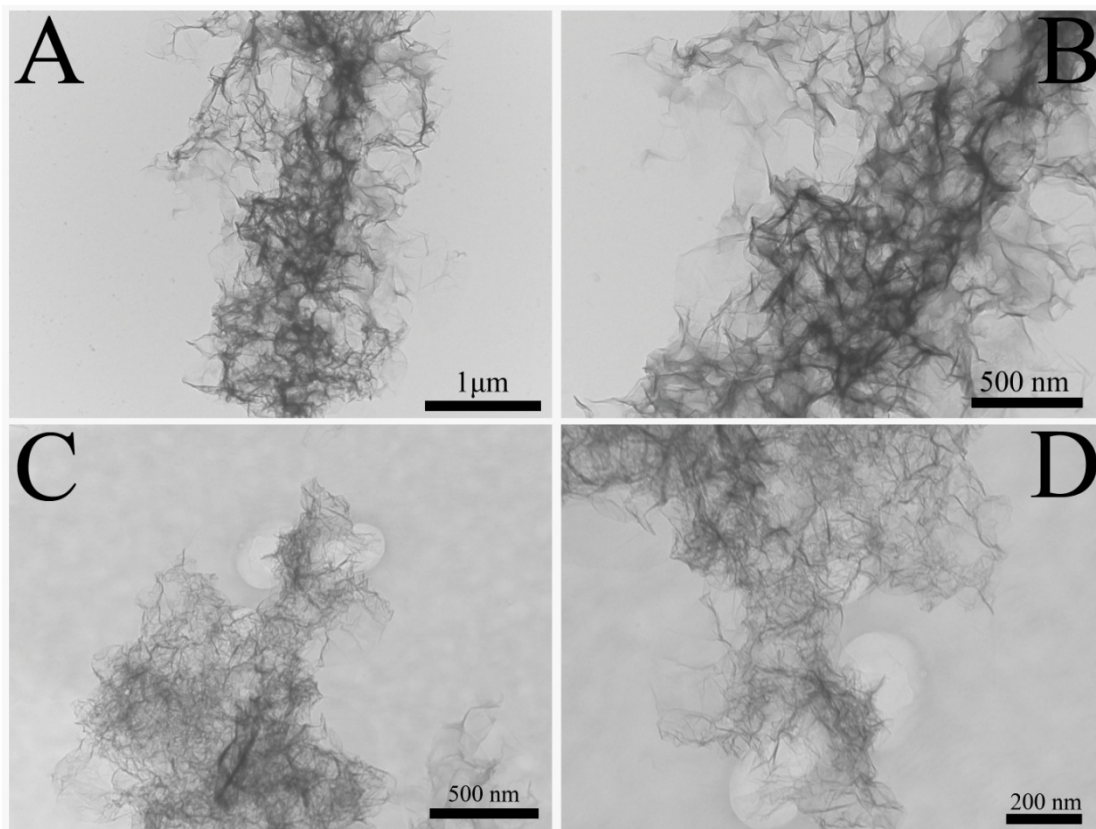

**Fig. S4** TEM images of the comparative sample Sb<sub>2</sub>S<sub>3</sub>-G prepared in water/EG with the use of L-cysteine (A, B) and Na<sub>2</sub>S (C, D).

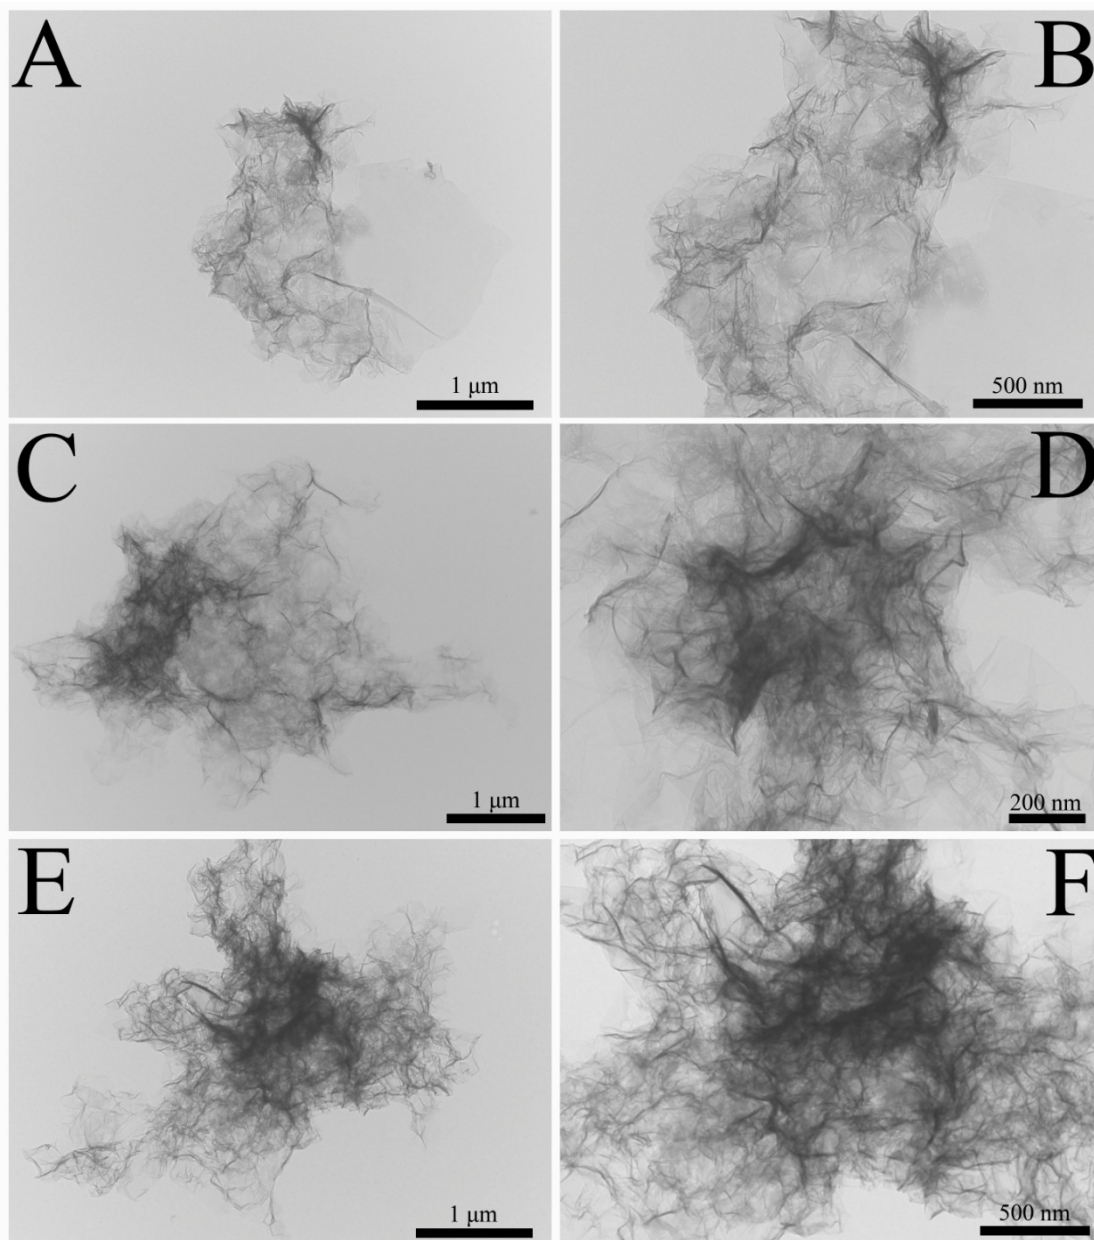

**Fig. S5** TEM images of  $\text{Sb}_2\text{S}_3$ -G was synthesized in water/EG via fixing the amount of  $\text{Sb}^{3+}$  while setting the GO concentrations as 1.5 mg/mL (A, B), 1 mg/mL (C, D) and 0.5 mg/mL (E, F).
